# Supplementary material for: Evidence for an early innate immune response in the motor cortex of ALS
Source: Springer Nature journal article supplement (doi:10.1186/s12974-017-0896-4), 2017-06-26

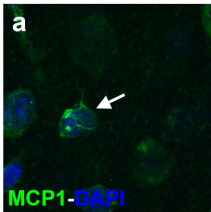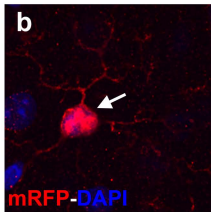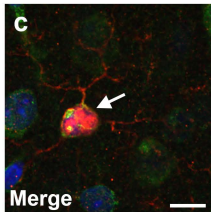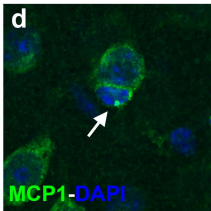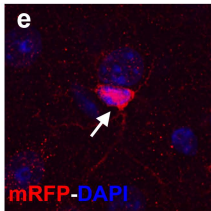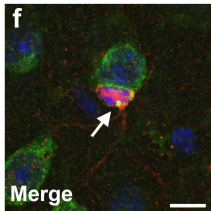

Supplement: MOESM1 [file 12477296]
