# Supplementary material for: Evidence for an early innate immune response in the motor cortex of ALS
Source: Springer Nature journal article supplement (doi:10.1186/s12974-017-0896-4), 2017-06-26

**MCP1-CCR2-WT**

Layer V/Motor cortex

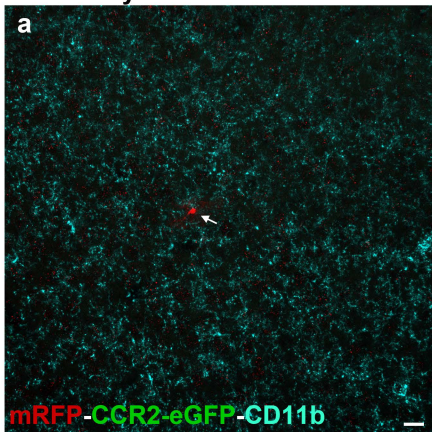

**MCP1-CCR2-hSOD1<sup>G93A</sup>**

Layer V/Motor cortex

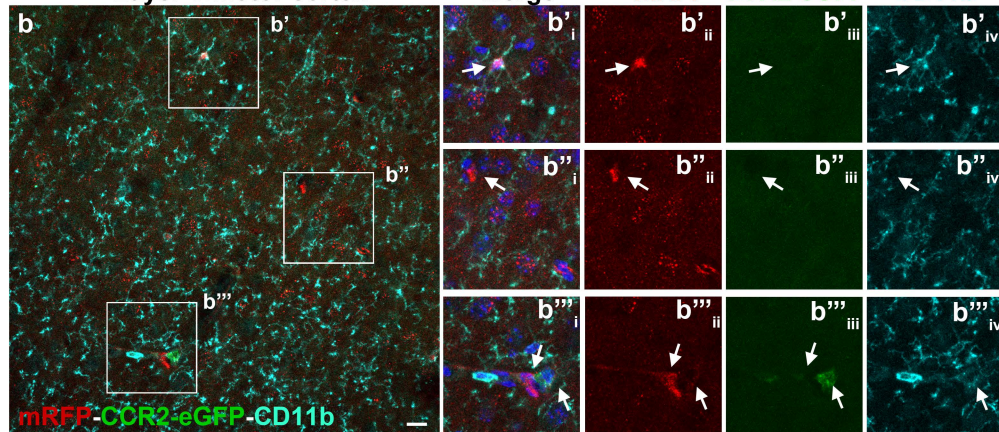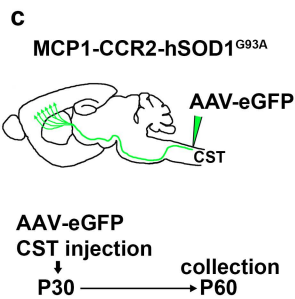

**MCP-CCR2-hSOD1<sup>G93A</sup>**

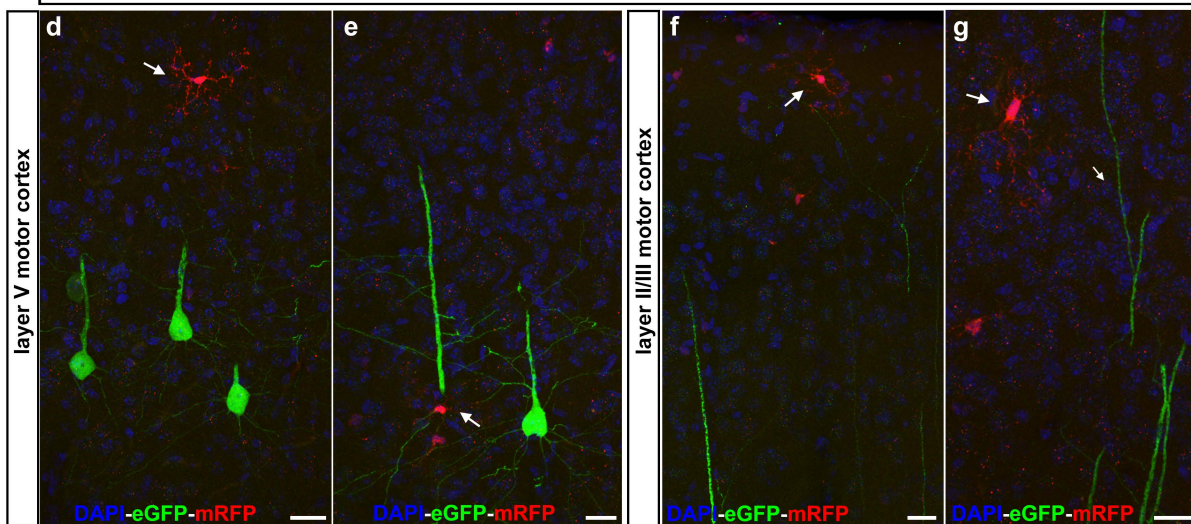

**MCP-CCR2-hSOD1<sup>G93A</sup>**

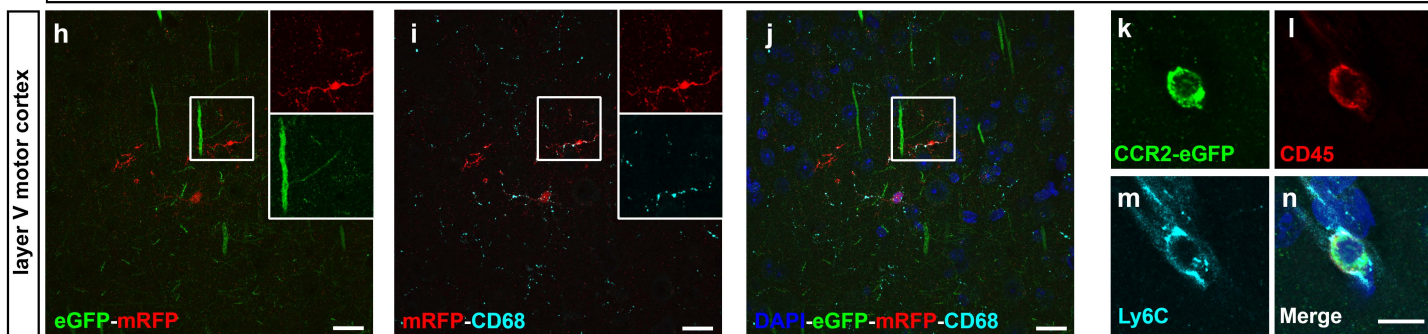

Supplement: MOESM2 [file 12477296]
