# Supplementary material for: Evidence for an early innate immune response in the motor cortex of ALS
Source: Springer Nature journal article supplement (doi:10.1186/s12974-017-0896-4), 2017-06-26
Supplement: MOESM3 [file 12477296]

liver MCP1-CCR2-hSOD1<sup>G93A</sup> 6 hrs post LPS

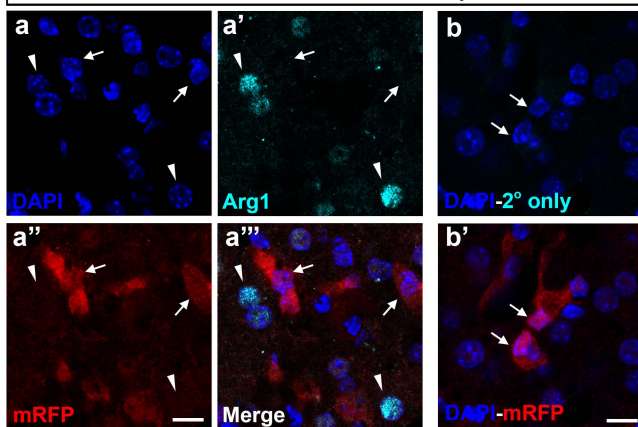

spleen MCP1-CCR2-hSOD1<sup>G93A</sup> 6 hrs post LPS

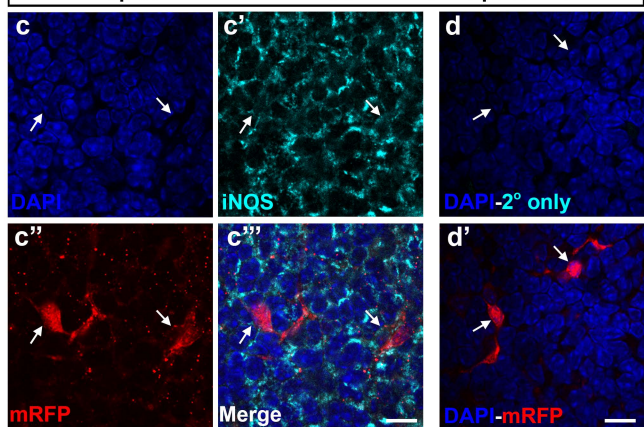

MCP1-CCR2-WT

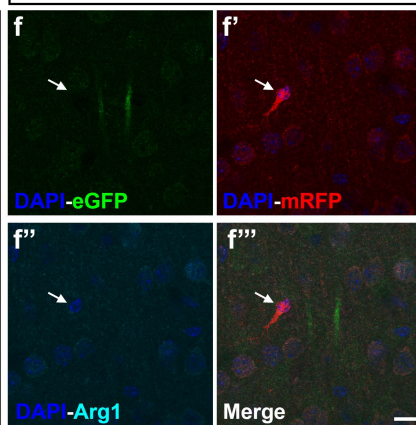

MCP1-CCR2-hSOD1<sup>G93A</sup>

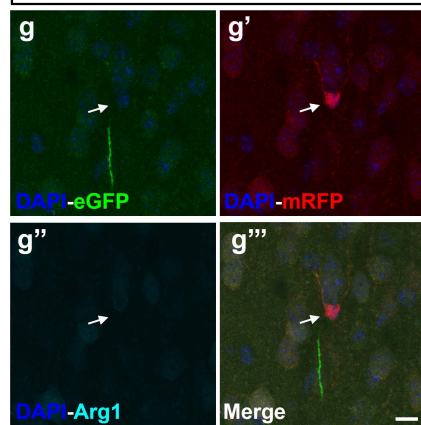

layer II/III motor cortex

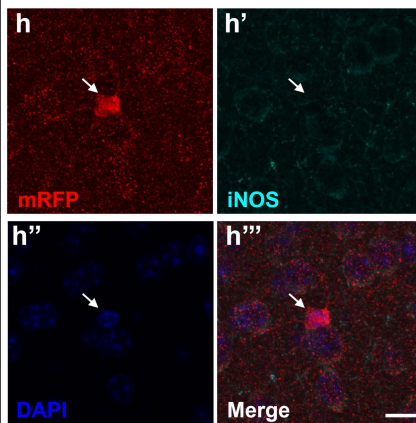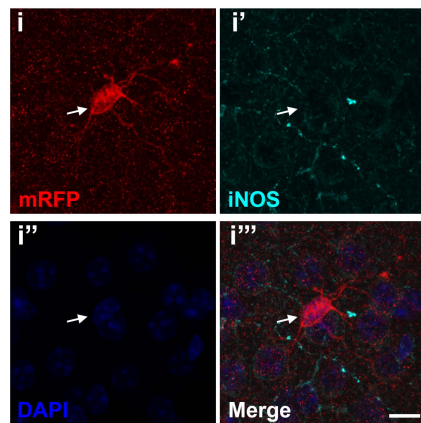

e

MCP1-CCR2-WT  
MCP1-CCR2-hSOD1<sup>G93A</sup>

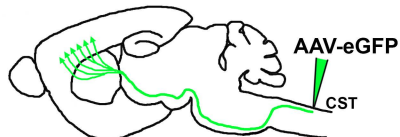

AAV-eGFP  
CST injection  
P30 → collection  
P60
